# Supplementary material for: Scalable synthesis of graphene-wrapped Li4Ti5O12dandelion-like microspheres for lithium-ion batteries with excellent rate capability and long-cycle life
Source: Royal Society of Chemistry journal article supplement (doi:10.1039/c4ta04711g), 2014-10-16
Supplement: c4ta04711g1.pdf [file c4ta04711g1.pdf]

## Electronic supplementary information

### **Scalable Synthesis of Graphene-wrapped $\text{Li}_4\text{Ti}_5\text{O}_{12}$ Dandelion-like Microspheres for Lithium-ion Batteries with Excellent rate capability and Long-cycle Life**

Dezhi Kong,<sup>a</sup> Weina Ren,<sup>a</sup> Yongsong Luo,<sup>b</sup> Yaping Yang <sup>a</sup> and Chuanwei Cheng \*<sup>a</sup>

<sup>a</sup> *MOE Key Laboratory of Advanced Micro-structured Materials, School of Physics Science and Engineering, Tongji University, Shanghai 200092, P.R. China*

<sup>b</sup> *Department of Physics & Electronic Engineering, Xinyang Normal University, Xinyang 464000, P. R.China*

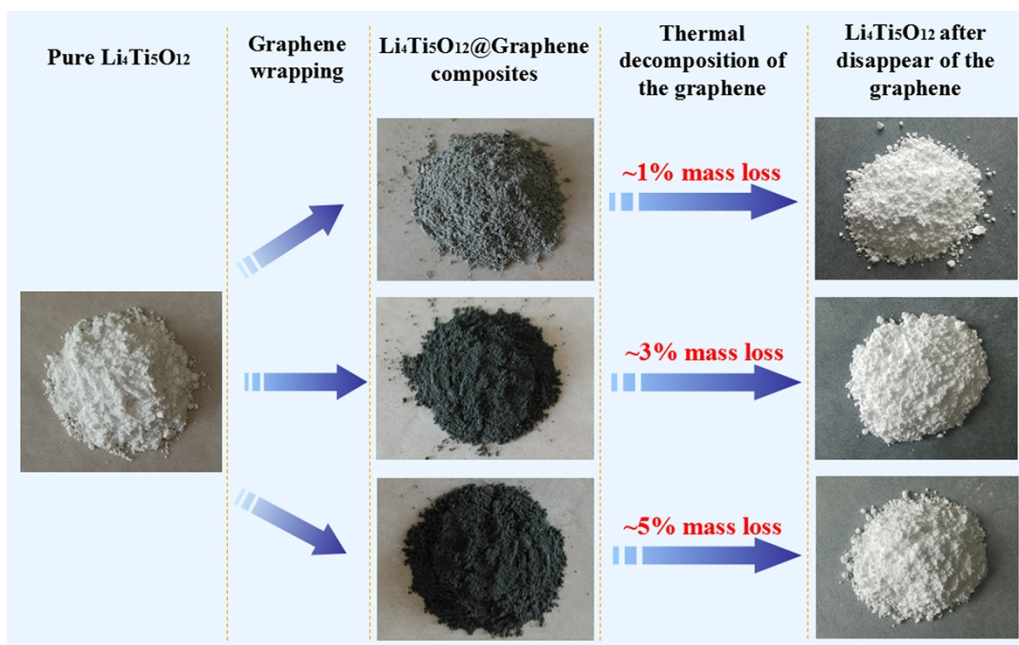

**Figure S1.** Comparison of the individual colors of the prepared samples.

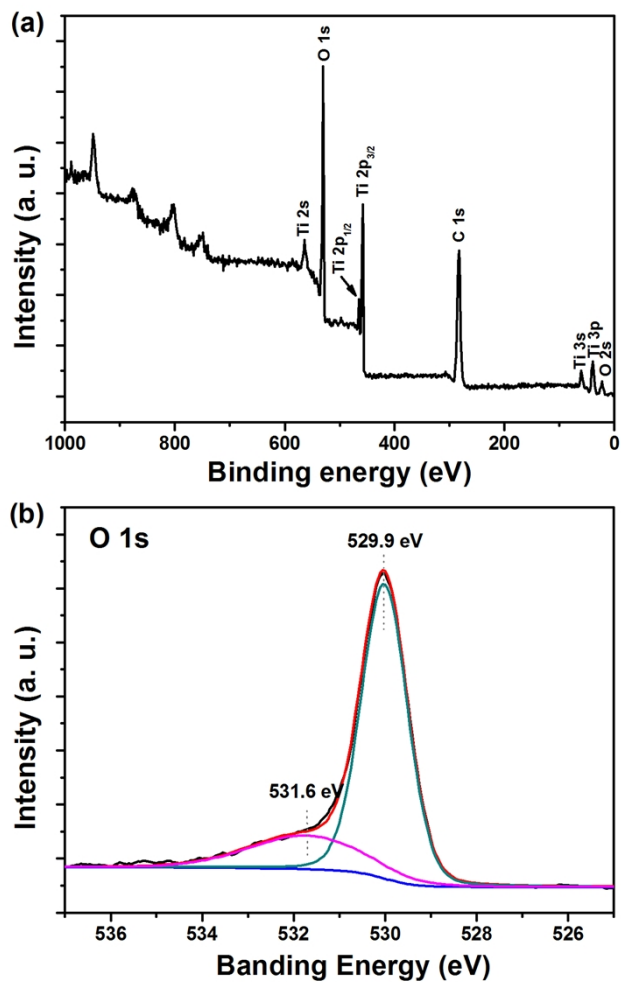

**Figure S2.** (a) XPS spectra of as-synthesized  $\text{Li}_4\text{Ti}_5\text{O}_{12}$ @graphene hierarchical heterostructures; (b) XPS survey scan of O 1s region.

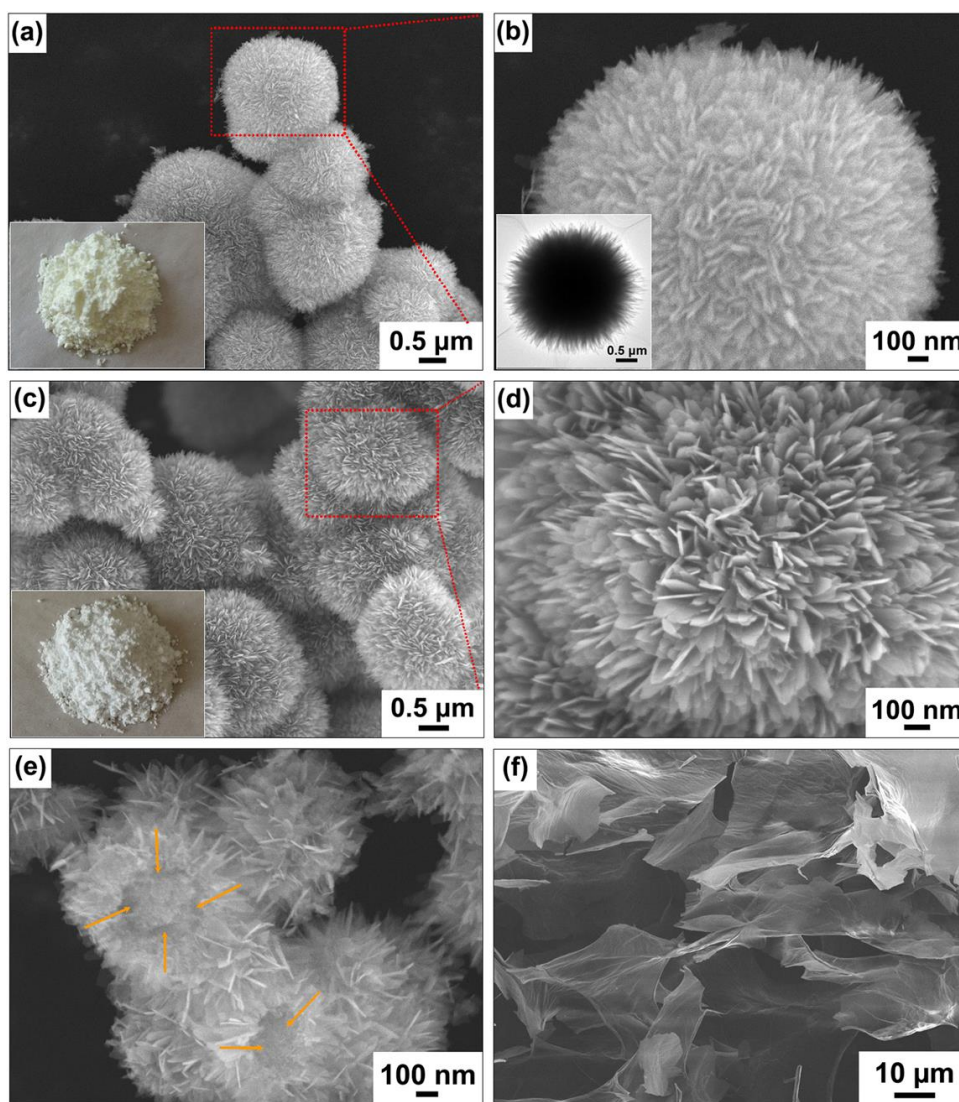

**Figure S3.** (a, b) SEM images of  $\text{Li}_4\text{Ti}_5\text{O}_{12}$  precursor at various magnifications; (c, d) SEM images of  $\text{Li}_4\text{Ti}_5\text{O}_{12}$  microspheres at various magnifications; (e) SEM image of a cross-sectionally damaged  $\text{Li}_4\text{Ti}_5\text{O}_{12}$  microspheres; (f) SEM images of GO nanosheets at low-magnifications; The insets of (a) and (c) are the photographs from  $\text{Li}_4\text{Ti}_5\text{O}_{12}$  precursor and  $\text{Li}_4\text{Ti}_5\text{O}_{12}$  microspheres, respectively, and the insets of (b) is the low-magnification TEM image of the  $\text{Li}_4\text{Ti}_5\text{O}_{12}$  precursor.

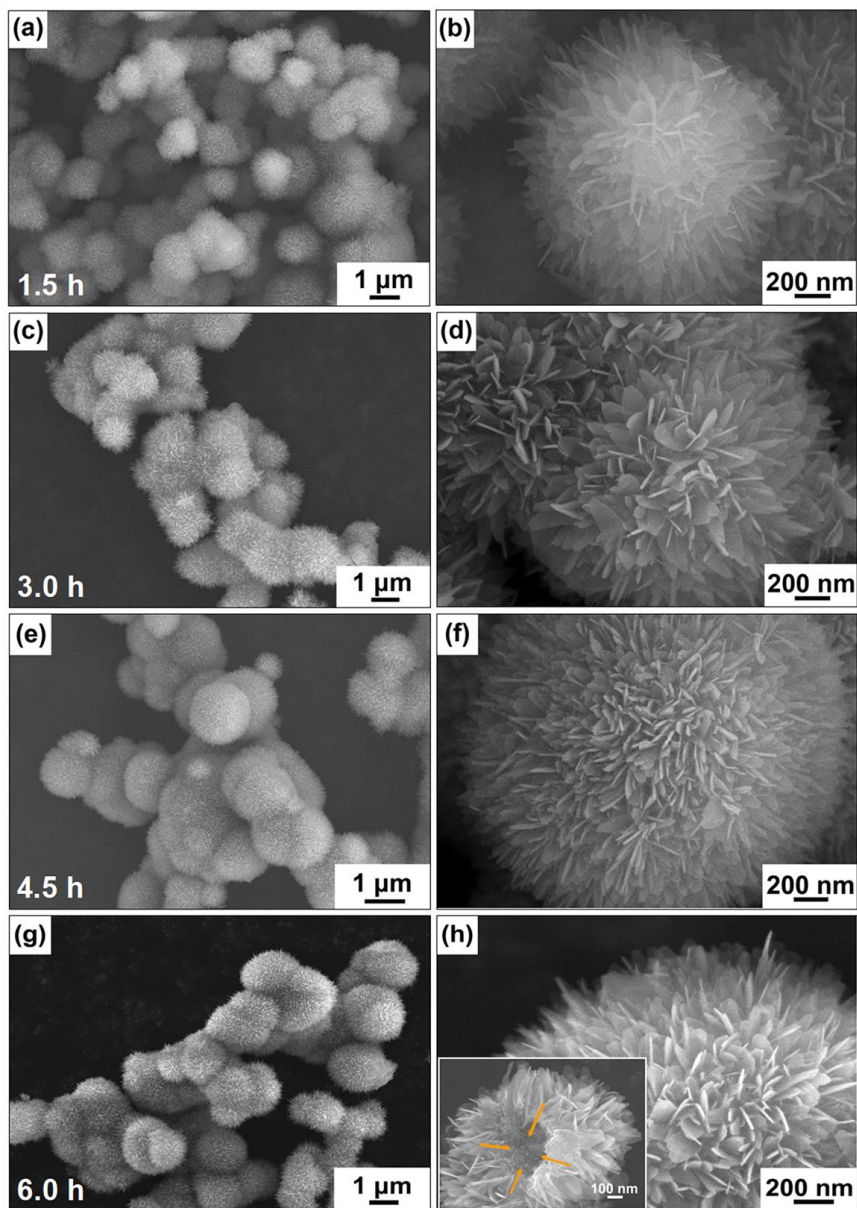

**Figure S4.** SEM images of the  $\text{Li}_4\text{Ti}_5\text{O}_{12}$  microspheres at various reaction stages with the different reaction time: (a, b) 1.5 h, (c, d) 3.0 h, (e, f) 4.5 h and (g, h) 6.0 h. The inset of (h) is the SEM pattern from a broken  $\text{Li}_4\text{Ti}_5\text{O}_{12}$  microsphere.



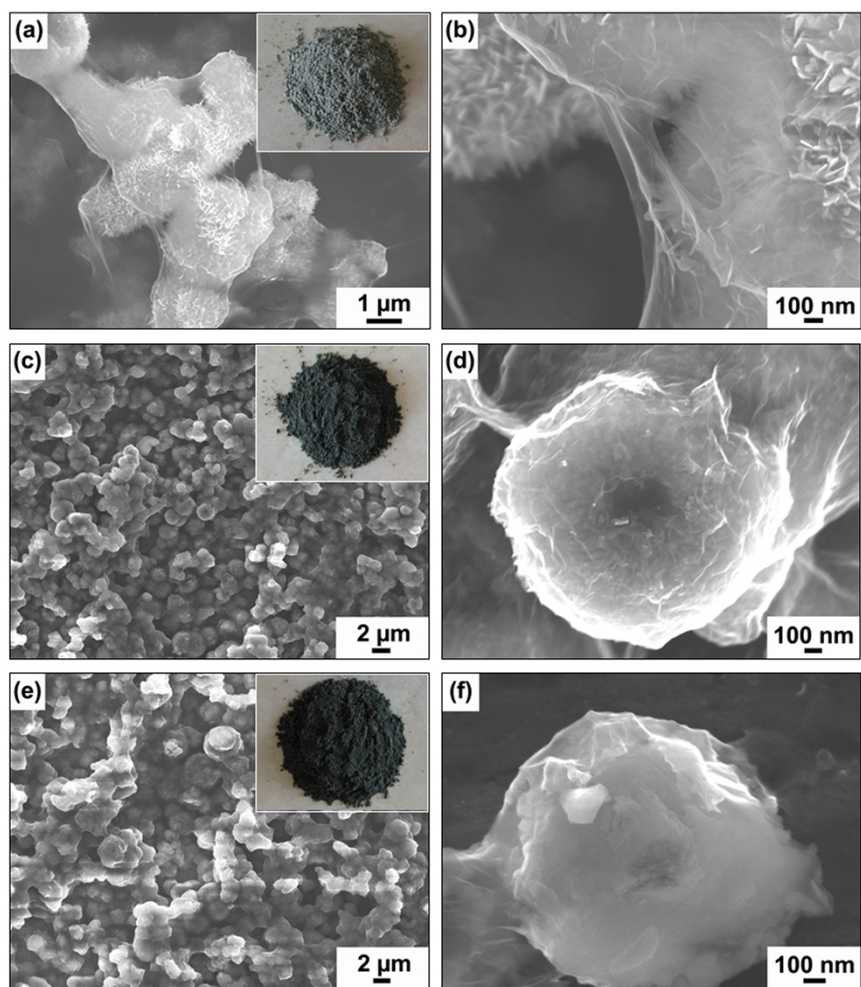

**Figure S5.** (a, b) SEM image of 1 wt% graphene coated  $\text{Li}_4\text{Ti}_5\text{O}_{12}$  microspheres at various magnifications; (c, d) SEM image of 3 wt% graphene coated  $\text{Li}_4\text{Ti}_5\text{O}_{12}$  microspheres at various magnifications; (e, f) SEM image of 5 wt% graphene coated  $\text{Li}_4\text{Ti}_5\text{O}_{12}$  microspheres at various magnifications.

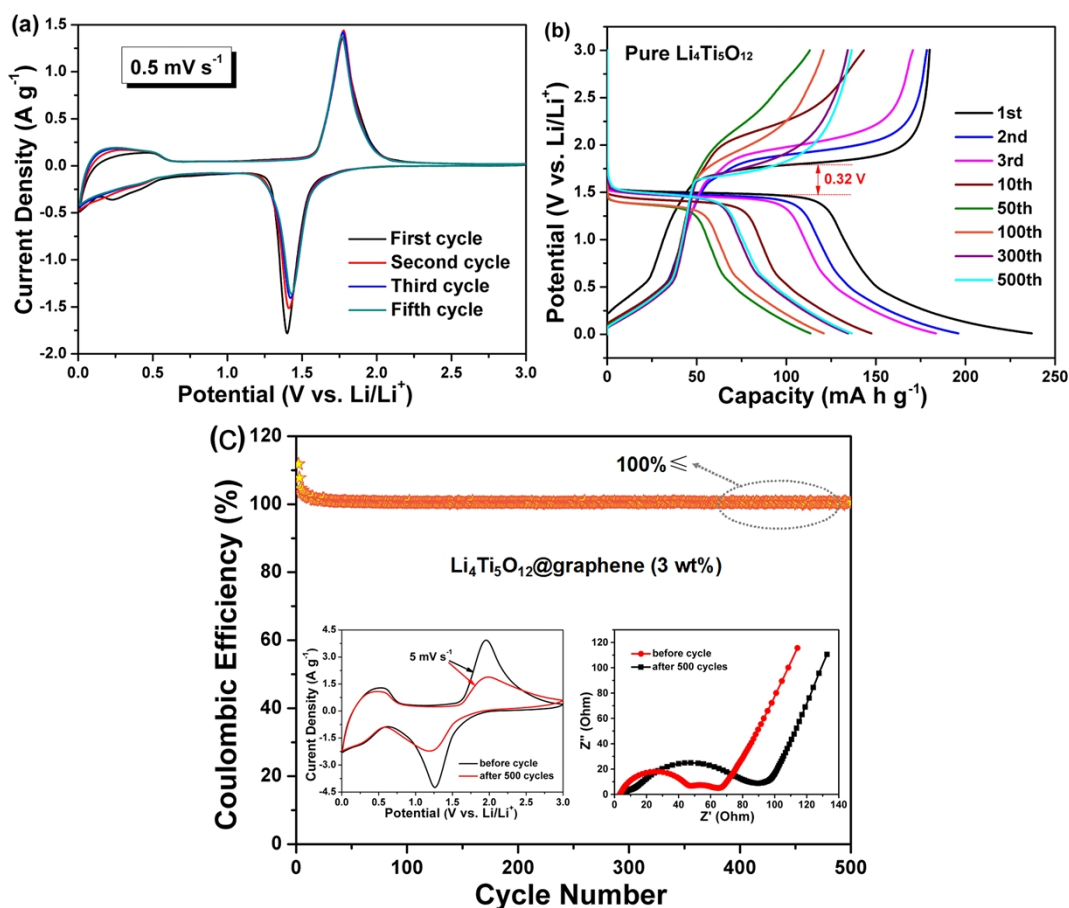

**Figure S6.** (a) Cyclic voltammograms of the  $\text{Li}_4\text{Ti}_5\text{O}_{12}$ @graphene (3 wt%) between 3.0 and 0.01 V at a scan rate of  $0.5 \text{ mV s}^{-1}$ ; (b) Galvanostatic discharge/charge profiles of the pure  $\text{Li}_4\text{Ti}_5\text{O}_{12}$  anode at a constant current density of  $0.12 \text{ A g}^{-1}$  for the 1st~500th; (c) The coulombic efficiency of 3 wt% graphene coated  $\text{Li}_4\text{Ti}_5\text{O}_{12}$  microspheres at a charge/discharge rate of  $0.12 \text{ A g}^{-1}$ . The insets of (c) are the cyclic voltammograms (CV) curves and electrochemical impedance spectroscopy (EIS) of the  $\text{Li}_4\text{Ti}_5\text{O}_{12}$ @graphene (3 wt%) composites electrode before and after cycling, respectively.

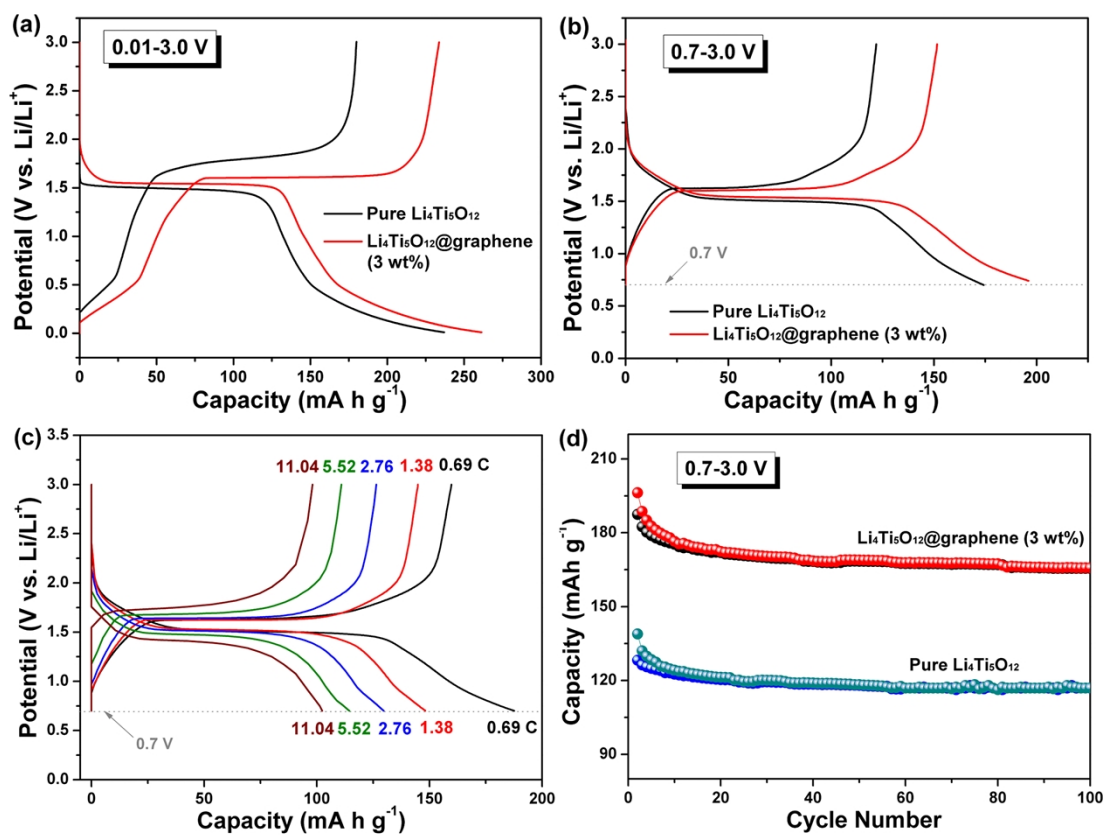

**Figure S7.** Initial charge-discharge curves of the pure  $\text{Li}_4\text{Ti}_5\text{O}_{12}$  and  $\text{Li}_4\text{Ti}_5\text{O}_{12}$ @graphene (3 wt%) composite electrodes between (a) 0.01-3.0 and (b) 0.7-3.0 V vs.  $\text{Li/Li}^+$  at 0.69 C rate; (c) Charge and discharge curves of  $\text{Li}_4\text{Ti}_5\text{O}_{12}$ @graphene (3 wt%) discharged to 0.7 V with a different charge and discharge rate; (d) Cycling performance of pure  $\text{Li}_4\text{Ti}_5\text{O}_{12}$  and  $\text{Li}_4\text{Ti}_5\text{O}_{12}$ @graphene (3 wt%) discharged to 0.7 V.



**Table 1.** Specific capacitance of the  $\text{Li}_4\text{Ti}_5\text{O}_{12}$  and  $\text{Li}_4\text{Ti}_5\text{O}_{12}$ @graphene composites prepared in this work and of the  $\text{Li}_4\text{Ti}_5\text{O}_{12}$  and  $\text{Li}_4\text{Ti}_5\text{O}_{12}$ -based composites reported in previous work. Information regarding the current density and the mass loading of active materials is included for better comparison among different samples.

| Materials                                                                  | Fabrication method                                                | Active mass loading     | Cycle potential range | Specific Capacitance                                                                  | Remarks                                                                       | Ref.      |
|----------------------------------------------------------------------------|-------------------------------------------------------------------|-------------------------|-----------------------|---------------------------------------------------------------------------------------|-------------------------------------------------------------------------------|-----------|
| dandelion-like $\text{Li}_4\text{Ti}_5\text{O}_{12}$ nanospheres           | hydrothermal reaction                                             | 1.42 mg/cm <sup>2</sup> | 0.01-3.0 V            | 136 mA h g <sup>-1</sup> after 500 cycles at 0.69 C rate                              | ~42% capacity loss for 500 cycles at 0.69 C rate                              | this work |
|                                                                            |                                                                   |                         | 0.7-3.0 V             | 117 mA h g <sup>-1</sup> after 100 cycles at 0.69 C rate                              | ~15.2% capacity loss for 100 cycles at 0.69 C rate                            |           |
| $\text{Li}_4\text{Ti}_5\text{O}_{12}$ @graphene (3 wt%) composites         | hydrothermal reaction                                             | 1.68 mg/cm <sup>2</sup> | 0.01-3.0 V            | 206 mA h g <sup>-1</sup> after 500 cycles at 0.69 C rate                              | ~21% capacity loss for 500 cycles at 0.69 C rate                              | this work |
|                                                                            |                                                                   |                         | 0.7-3.0 V             | 166 mA h g <sup>-1</sup> after 100 cycles at 0.69 C rate                              | ~15.3% capacity loss for 100 cycles at 0.69 C rate                            |           |
| $\text{Li}_4\text{Ti}_5\text{O}_{12}$                                      | solid-state method                                                | N. A.                   | 0.01-2.5 V            | 213 mA h g <sup>-1</sup> after 152 cycles at 1 C rate                                 | ~22% capacity loss for 152 cycles at 1 C rate                                 | [1]       |
| $\text{Li}_4\text{Ti}_5\text{O}_{12}$                                      | solid-state method                                                | N. A.                   | 0-2.5 V               | 197 mA h g <sup>-1</sup> after 50 cycles                                              | ~19% capacity loss for 50 cycles                                              | [2]       |
|                                                                            |                                                                   |                         | 0.5-2.5 V             | 165 mA h g <sup>-1</sup> after 50 cycles                                              | ~8.4% capacity loss for 50 cycles                                             |           |
| lanthanum-modified $\text{Li}_4\text{Ti}_5\text{O}_{12}$                   | solid-state method                                                | N. A.                   | 0-3.0 V               | 206 and 197 mA h g <sup>-1</sup> after 100 cycles at 1 C and 3 C                      | ~3% capacity loss for 100 cycles at 1 C rate                                  | [3]       |
| mesoporous $\text{Li}_4\text{Ti}_5\text{O}_{12}$ hollow spheres            | templating method                                                 | N. A.                   | 1.0-3.0 V             | 150 mA h g <sup>-1</sup> at 2C rate                                                   | ~12% capacity loss for 100 cycles at 5 C rate                                 | [4]       |
| hollow $\text{Li}_4\text{Ti}_5\text{O}_{12}$ urchin-like microspheres      | versatile sol-gel process, hydrothermal reaction                  | N. A.                   | 1.0-3.0 V             | 157.1 mA h g <sup>-1</sup> after 100 cycles at 2 C rate                               | ~1.9% capacity loss for 100 cycles at 2 C rate                                | [5]       |
| $\text{Li}_4\text{Ti}_5\text{O}_{12}$ -graphene hybrid nanostructures      | hydrothermal reaction                                             | N. A.                   | 0.9-2.5V              | 168.5mA h g <sup>-1</sup> at 0.1 C rate                                               | capacity loss was 3.1% at 1 C, 2.5% at 10 C and 2.9% at 60 C rate             | [6]       |
| nanosized $\text{Li}_4\text{Ti}_5\text{O}_{12}$ /graphene hybrid materials | ball milling                                                      | N. A.                   | 0.8-2.6 V             | 170 mA h g <sup>-1</sup> at 1 C rate                                                  | ~5.2% capacity loss for 300 cycles at 20 C rate                               | [7]       |
| microscale C- $\text{Li}_4\text{Ti}_5\text{O}_{12}$ particles              | solid-state reaction                                              | N. A.                   | 1.0-3.0 V             | 165 mA h g <sup>-1</sup> at 1 C rate                                                  | <1% capacity loss after 100 cycles at 1 C rate                                | [8]       |
| $\text{Li}_4\text{Ti}_5\text{O}_{12}$ @C hollow microspheres               | solution-phase selfassembly and subsequent solid-phase lithiation | N. A.                   | 1.0-3.0 V             | 152 mA h g <sup>-1</sup> and 116 mA h g <sup>-1</sup> at 1 C and 5 C, respectively    | a capacity retention of 120 mA h g <sup>-1</sup> after 80 cycles at 10 C rate | [9]       |
| $\text{Li}_4\text{Ti}_5\text{O}_{12}$ /C composite                         | hydrothermal method                                               | N. A.                   | 1.0-2.5 V             | 176 mA h g <sup>-1</sup> and 136 mA h g <sup>-1</sup> at 0.1 C and 20 C, respectively | ~19.7% and 24.2% capacity loss for 200 cycles at 10 and 20C rate              | [10]      |
| $\text{Li}_4\text{Ti}_5\text{O}_{12}$ nanosheets/ N-doped carbon           | N. A.                                                             | N. A.                   | 0.9-2.5V              | 170.1 mA h g <sup>-1</sup> at 1C rate                                                 | <1% capacity loss after 100 cycles at 10 C rate                               | [11]      |
| Microscale C- $\text{Li}_4\text{Ti}_5\text{O}_{12}$ particles              | Solid-state reaction                                              | N. A.                   | 1.0-3.0 V             | 165 mA h g <sup>-1</sup> and 123 mA h g <sup>-1</sup> at 1 C and 10 C, respectively   | ~6.3% capacity loss for 100 cycles at 10 C rate                               | [12]      |

## References

- [1] D. M. Wu, *Ionics*, 2012, **18**, 559-564.
- [2] T. F. Yi, J. Shu, Y. R. Zhu, X. D. Zhu, R. S. Zhu, A. N. Zhou, *J. Power Sources*, 2010, **195**, 285-288.
- [3] T. F. Yi, Y. Xie, Q. J. Wu, H. P. Liu, L. J. Jiang, M. F. Ye and R. S. Zhu, *J. Power Sources*, 2012, **214**, 220-226.
- [4] L. Yu, H. B. Wu and X. W. Lou, *Adv. Mater.*, 2013, **25**, 2296-2300.
- [5] J. Cheng, R. C. Che, C. Y. Liang, J. W. Liu, M. Wang and J. J. Xu, *Nano Research*, 2014, **7**, 1043-1053.
- [6] L. F. Shen, C. Z. Yuan, H. J. Luo, X. G. Zhang, S. D. Yanga and X. J. Lu, *Nanoscale*, 2011, **3**, 572-574.
- [7] Y. Shi, L. Wen, F. Li and H. M. Cheng, *Journal of Power Sources*, 2011, **196**, 8610-8617.

- [8] H. G. Jung, S. T. Myung, C. S. Yoon, S. B. Son, K. H. Oh, K. Amine, B. Scrosati and Y. K. Sun, *Energy Environ. Sci.*, 2011, **4**, 1345-1351.
- [9] J. Liu, W. Liu, S. M. Ji, Y. L. Wan, H. Q. Yin and Y. C. Zhou, *Eur. J. Inorg. Chem.*, 2014, **2014**, 2073-2079.
- [10] B. H. Li, C. H. Han, Y. B. He, C. Yang, H. D. Du, Q. H. Yang and F. Y. Kang, *Energy Environ. Sci.*, 2012, **5**, 9595-9602.
- [11] N. Li, G. M. Zhou, F. Li, L. Wen and H. M. Cheng, *Adv. Funct. Mater.*, 2013, **23**, 5429-5435.
- [12] H. G. Jung, S. T. Myung, C. S. Yoon, S. B. Son, K. H. Oh, K. Amine, B. Scrosati and Y. K. Sun, *Energy Environ. Sci.*, 2011, **4**, 1345-1351.
